# Supplementary material for: Single Nucleotide Polymorphisms Can Create Alternative Polyadenylation Signals and Affect Gene Expression through Loss of MicroRNA-Regulation
Source: PLOS journal article supplement (doi:10.1371/journal.pcbi.1002621), 2012-08-16
Supplement: S1 (10.1371/journal.pcbi.1002621.s001) [file journal.pcbi.1002621.s001]

Identification of SNPs in APA signals  
(412 candidate SNPs)

EST analysis

SNPs tested: 13  
Significant SNPs: 2

RNA-seq analysis

SNPs tested: 36  
Significant SNPs: 1

Microarray analysis

SNPs tested: 243  
Significant SNPs: 13

GWAS analysis

9 of the 16 significant  
SNPs linked to GWAS SNPs
