# Supplementary material for: Single Nucleotide Polymorphisms Can Create Alternative Polyadenylation Signals and Affect Gene Expression through Loss of MicroRNA-Regulation
Source: PLoS Comput Biol. 2012 Aug 16;8(8):e1002621. doi: 10.1371/journal.pcbi.1002621 (PMC3420919; doi:10.1371/journal.pcbi.1002621)
Supplement: Table S1 — A portion of the EST-based polyA sites from PolyA_Db that do not have any signal in N nucleotides upstream of the cleavage site when looking at the reference genome, can be explained by a SNP in the region creating a signal from the SNP's non-reference allele. (PDF) [file pcbi.1002621.s005.pdf]

| Region Size<br>$N$ | # PolyA sites<br>without Signal | # PolyA sites with SNP-created Signal |          |          |
|--------------------|---------------------------------|---------------------------------------|----------|----------|
|                    |                                 | CEU Hapmap                            | dbSNP126 | dbSNP130 |
| 40                 | 1728                            | 6/1728                                | 21/1728  | 24/1728  |
| 80                 | 1343                            | 9/1343                                | 20/1343  | 26/1343  |
| 100                | 1210                            | 10/1210                               | 22/1210  | 26/1210  |
