# Supplementary material for: Single Nucleotide Polymorphisms Can Create Alternative Polyadenylation Signals and Affect Gene Expression through Loss of MicroRNA-Regulation
Source: PLoS Comput Biol. 2012 Aug 16;8(8):e1002621. doi: 10.1371/journal.pcbi.1002621 (PMC3420919; doi:10.1371/journal.pcbi.1002621)
Supplement: Table S6 — Significant APA-SNPs from the microarray, EST and RNA-seq analyses. (XLS) [file pcbi.1002621.s010.xls]

## Sheet: microarray
SNP	Gene	3'UTRlength	SNPprop	Signal	GU	DS Lymphoblastoid cell	pearson r	pvalue	BH pv	bonf pv	comments
rs3763406	FAM62B	3209	0.665005	2	0.5	0.101839	0.417525	3.85658e-12	9.37149e-10	9.37149e-10
rs986475	NCR3	172	0.77907	1	0.7	0.000407958	0.409501	1.04745e-11	1.27265e-09	2.54531e-09
rs3743955	ITPRIPL2	5561	0.909189	9	0.59	0.0412744	0.378411	3.94476e-10	3.19525e-08	9.58576e-08
rs10793442	ZNF239	358	0.924581	9	0.76	0.000184481	0.341778	1.78336e-08	1.08339e-06	4.33357e-06
rs1060379	ZNF117	3667	0.820016	2	0.52	0.0531392	0.336902	2.85793e-08	1.38895e-06	6.94476e-06
rs15062	BCKDHB	2466	0.920925	2	0.48	0.0325706	0.282558	3.23411e-06	0.000130981	0.000785888
rs6972005	CALU	2310	0.804762	6	0.59	0.0167943	0.267295	8.51712e-06	0.000295666	0.00206966
rs9162	CCDC74A	268	0.742537	8	0.48	0.000491307	0.240754	3.7625e-05	0.00106679	0.00914287
rs6777019	CGGBP1	3523	0.514902	7	0.67	0.132064	0.247473	4.2308e-05	0.00106679	0.0102808
rs4612984	EXOC5	6133	0.71205	2	0.47	0.174805	0.248911	4.39007e-05	0.00106679	0.0106679
rs1052873	PBK	684	0.0409357	8	0.51	0.0749887	0.237818	6.10841e-05	0.0013494	0.0148434	missing APA homozygotes
rs3209335	PPM1A	6606	0.903724	6	0.69	0.00972632	0.222112	0.000130513	0.00264288	0.0317146
rs1942	RTF1	2875	0.534957	9	0.49	0.103896	0.22805	0.000150967	0.00282193	0.0366851
rs1043881	BCAT1	6663	0.984241	13	0.44	-0.00723978	0.221772	0.00022273	0.00386596
rs29069	VAPA	5810	0.301549	8	0.49	0.0970796	0.209848	0.000452811	0.00733554
rs11920	C10ORF18	1948	0.443018	4	0.51	0.176272	0.204189	0.000702307	0.0106663
rs9242	SRGAP2	3018	0.871438	13	0.45	0.0258435	0.186179	0.00108397	0.0154945
rs1188401	MATN1	2303	0.682154	7	0.21	0.0252191	0.177719	0.0026846	0.0362421
rs7305647	SUDS3	3602	0.923931	9	0.7	0.0106867	0.174068	0.00304599	0.0389565
rs1156	CHD6	2063	0.583131	5	0.53	0.155921	0.156541	0.00506471			missing APA homozygotes
rs702530	PDE4D	5625	0.521422	3	0.37	0.0244365	0.162585	0.00524403
rs3745008	SLC14A2	576	0.0295139	7	0.31	0.0793787	0.161045	0.00562648
rs1053489	WDR48	1647	0.63388	13	0.63	0.0765404	0.157401	0.00672564
rs1653589	CAMKK2	3007	0.320253	10	0.56	0.0694151	0.154006	0.00770511
rs12608564	ZNF551	1513	0.555849	8	0.55	0.0763616	0.153966	0.00771875
rs1057403	BTK	431	0.443155	5	0.4	0.00293476	0.145534	0.0110734
rs10921309	TROVE2	1582	0.185209	7	0.37	0.106933	0.14209	0.0118991
rs703258	VCL	1987	0.797182	11	0.52	0.0841768	0.136354	0.0126625
rs11948089	WDR36	3619	0.500691	7	0.54	0.138087	0.137574	0.0126975
rs1061686	NUDT19	1839	0.914084	2	0.35	0.000355877	0.139959	0.0131524
rs10686	SEC23IP	7966	0.98933	11	0.72	0.00422229	0.130463	0.0162205
rs2833955	C21ORF62	3004	0.850866	9	0.64	0.0605835	0.129241	0.0170563
rs1061646	ZNF276	2678	0.494025	5	0.55	0.0946652	0.131268	0.0198294
rs506619	DTNA	2651	0.116937	13	0.53	0.154331	0.127799	0.0219649
rs4145905	SORBS1	3286	0.406573	10	0.67	0.199934	0.126766	0.0232837
rs10143429	C14ORF129	1542	0.929313	10	0.57	0.00131025	0.12108	0.0269729			missing nonAPA homozygotes
rs4558	TJP2	830	0.746988	8	0.63	0.0515178	0.1181	0.0281209			missing nonAPA homozygotes
rs27194	NLRC5	996	0.0742972	9	0.5	0.152482	0.116604	0.029484
rs3731661	WDR35	3290	0.748328	10	0.7	0.0262437	0.115563	0.0324348
rs12479	HSPA13	2501	0.267093	13	0.56	0.116941	0.117422	0.0327046
rs3750992	TRIM68	1604	0.113466	11	0.49	0.154981	0.116093	0.0342686
rs158688	SYK	2950	0.329492	5	0.25	0.110592	0.115553	0.0349214
rs10476052	ICHTHYIN	1762	0.321226	5	0.53	0.160731	0.114669	0.035151			missing APA homozygotes
rs8970	LTBP1	963	0.11215	7	0.45	0.119291	0.115107	0.0354681
rs3748983	FLJ11151	5087	0.0949479	10	0.53	0.274772	0.109174	0.0366512			missing APA homozygotes
rs15563	UBE2Z	1926	0.36189	4	0.58	0.0751953	0.1123	0.0396866
rs11708200	NPHP3	1300	0.203846	8	0.49	0.219118	0.106609	0.0410364			missing APA homozygotes
SNP:	SNP rsid
Gene:	gene name
3'UTRlength:	3'UTR length
SNPprop:	proportion of the 3'UTR upstream of the SNP
Signal:	APA signal rank
GU:	GU level downstream of the SNP
DS Lymphoblastoid cell:	miRNA score of the SNP based on lymphoblastoid miRNA expression and target prediction
pearson r:	pearson correlation coefficient between the SNP and gene expression
pvalue:	p-value without correction for multiple testing
BH pv:	p-value after benjamini correction
bonf pv:	p-value after bonferonni correction

## Sheet: EST
						p-value without Correction		p-value after BH correction
SNP	Gene	3'UTRlen	SNPprop	Signal	GU	no hapl imputation	imputation	no hapl imputation	imputation
rs17497828	MIER1	2146	0.0773532	2	0.48	0.016	0.004	0.103	0.032
rs532	PNN	1355	0.0929889	7	0.66	0.004	0.005	0.058	0.032
SNP:	SNP rsid
Gene:	gene name
3'UTRlength:	3'UTR length
SNPprop:	proportion of the 3'UTR upstream of the SNP
Signal:	APA signal rank
GU:	GU level downstream of the SNP
p-value without Correction:			pvalue of 2x2 chi^2 test, without correction
p-value after BH correction			pvalue after benjamini correction
no hapl imputation			pvalue without including alleles imputated through haplotypes
imputation			pvalue including alleles imputated through haplotypes

## Sheet: RNASeq
snp	gene	cell line	data	3'UTRlength	SNPprop	Signal	GU	Ds	APAal	APAcount	al2	count2	N	logAR	APAal proportion	chisq pv	BH pv	Bonf pv
rs2269123	MRPS34	BT474	burge	326	0.190184	5	0.56	0.0042247	T	53.5731	C	19.6542	73.2273	1.44667	0.7316	7.37844e-05	0.00276691	0.00553383
rs2269123	MRPS34	MCF-7	burge	326	0.190184	5	0.56	0.00358272	T	113.894	C	26.3576	140.252	2.1114	0.812069	1.45106e-13	1.0883e-11	1.0883e-11
SNP:	SNP rsid
Gene:	gene name
cell line	cell line name
data	dataset name
3'UTRlength:	3'UTR length
SNPprop:	proportion of the 3'UTR upstream of the SNP
Signal:	APA signal rank
GU:	GU level downstream of the SNP
DS	miRNA score of the SNP based on matched cell line miRNA expression and target prediction
APAal	APA allele
APAcount	APA allele counts (read quality based)
al2	nonAPA allele
count2	nonAPA allele counts (read quality based)
N	total count
logAR	allelic log ratio
APAal proportion	propotion of APA allele
chisq pv	1df chi^2 test pvalue
BH pv:	p-value after benjamini correction
bonf pv:	p-value after bonferonni correction

## Sheet: GWAS
	APA SNP							PolyA motif			GWAS SNP										LD
chrom.	rsid	position	MAF	gene	APA allele (+strd)	WT allele (+strd)	Analysis	motif	start	end	rsid	position	MAF	risk allele (+strd)	non risk allele (+strd)	PUBMED	Trait	Sample	Replicate	p-value	r	r^2	mean(r )	mean(r^2)
10	rs11920	5845864	0.233	C10ORF18	A	C	microarray	AGU[A]AA	5845860	5845865	rs2380205	5926740	0.492	C	T	20453838	Breast cancer	British	European	5e-07	0.167	0.028	0.167	0.028
16	rs1061646	88333478	0.4	ZNF276	A	G	microarray	AAGAA[A]	88333472	88333477	rs258322	88283404	0.175	A	G	19578364	Melanoma	European ancestry	European ancestry	3e-27	0.564	0.318	0.564	0.318
16	rs1061646	88333478	0.4	ZNF276	A	G	microarray	AAGAA[A]	88333472	88333477	rs258322	88283404	0.175	A	G	18483556	hair color	European ancestry	Individuals	2e-23	0.564	0.318
16	rs2269123	1762160	0.103	MRPS34	T	C	RNA-seq	AAG[A]AA	1762157	1762162	rs1065656	1778837	0.292	G	C	21216879	Insulin-like growth factors	European ancestry	NR	1e-11	0.543	0.295	0.543	0.295
17	rs15563	44360192	0.483	UBE2Z	A	G	microarray	[A]GUAAA	44360191	44360196	rs46522	44343596	0.483	T	C	21378990	Coronary heart disease	European ancestry	Individuals	2e-08	-1	1	-0.449	0.202
17	rs15563	44360192	0.483	UBE2Z	A	G	microarray	[A]GUAAA	44360191	44360196	rs9674544	44439710	0.442	G	A	20195514	Primary tooth development (number of teeth)	European ancestry	NR	2e-08	-0.449	0.202
17	rs15563	44360192	0.483	UBE2Z	A	G	microarray	[A]GUAAA	44360191	44360196	rs9674544	44439710	0.442	G	A	20195514	Primary tooth development (time to first tooth eruption)	European ancestry	NR	8e-07	-0.449	0.202
18	rs3745008	41516499	0.458	SLC14A2	T	C	microarray	AA[U]ACA	41516496	41516501	rs10502868	41407947	0.092	C	T	19260141	Biochemical measures	Croatian	NR	7e-06	0.114	0.013	0.114	0.013
21	rs12479	14667140	0.292	HSPA13	T	C	microarray	A[A]UAGA	14667135	14667140	rs1006899	14766923	0.158	A	G	19079262	Bone mineral density (spine)	Individuals	Individuals	6e-06	0.077	0.006	0.077	0.006
5	rs10476052	156833112	0.067	ICHTHYIN	A	C	microarray	AAG[A]AA	156833108	156833113	rs11740562	156874863	0.043	G	A	20889312	Bipolar disorder and schizophrenia	European ancestry	NR	1e-06	0.931	0.867	0.3	0.58
5	rs10476052	156833112	0.067	ICHTHYIN	A	C	microarray	AAG[A]AA	156833108	156833113	rs2277027	156864954	0.308	A	C	20010835	Pulmonary function	European ancestry	European ancestry	1e-10	-0.4	0.16
5	rs11948089	110492292	0.133	WDR36	A	T	microarray	[A]AUACA	110492291	110492296	rs2416257	110463389	0.133	C	T	19198610	Asthma and myocardial infarction	European	European and asian	1e-06	1	1	1	1
6	rs986475	31664688	0.036	NCR3	A	G	microarray	AA[U]AAA	31664684	31664689	rs2844479	31680935	0.317	A	C	19079260	Obesity	Individuals	Individuals	2e-08	0.306	0.094	0.033	0.002
6	rs986475	31664688	0.036	NCR3	A	G	microarray	AA[U]AAA	31664684	31664689	rs3117582	31728499	0.092	G	T	19836008	Lung adenocarcinoma	European ancestry	European ancestry	5e-12	0.066	0.004
APA SNP: SNP id, position, minimum allele frequency, gene where the SNP is located, the APA and WT alleles, and the analysis where the SNP was significantly associated with APA
PolyA motif: signal hexamer showing the APA allele, its start and end
GWAS SNP: SNP id, position, minimum allele frequency, risk and non risk alleles, pubmed id, trait, samples, p-value
LD: r and r^2 values. Positive r shows a positive correlation between APA and risk alleles. High r^2 shows LD
APA alleles, WT alleles, Risk alleles, and non risk alleles are shown on the positive strand of DNA
mean(r ) and mean(r^2) are mean values computed for each APA SNP by taking the average r's when an APA SNP is paired to several GWAS SNPs
